# Supplementary material for: Conformational plasticity of RAS Q61 family of neoepitopes results in distinct features for targeted recognition
Source: PubMed Central journal article supplement (PMC10713829; doi:10.1038/s41467-023-43654-9), 2023-12-11
Supplement: 41467_2023_43654_MOESM1_ESM.pdf [file 41467_2023_43654_MOESM1_ESM.pdf]

1 **Conformational plasticity of *RAS Q61* family of neopeptides results in distinct features for**  
2 **targeted recognition**

3  
4 Andrew C. McShan<sup>1,2,3†</sup>, David Flores-Solis<sup>4,5,†</sup>, Yi Sun<sup>1,2</sup>, Samuel E. Garfinkle<sup>1,2</sup>, Jugmohit S.  
5 Toor<sup>4,6</sup>, Michael C. Young<sup>1</sup>, and Nikolaos G. Sgourakis<sup>1,2,7</sup>

6  
7 <sup>1</sup>Center for Computational and Genomic Medicine, Department of Pathology and Laboratory  
8 Medicine, The Children's Hospital of Philadelphia, Philadelphia, PA, 19104, USA

9  
10 <sup>2</sup>Department of Biochemistry and Biophysics, Perelman School of Medicine, University of  
11 Pennsylvania, Philadelphia, PA, 19104, USA

12  
13 <sup>3</sup>Present address: School of Chemistry & Biochemistry, Georgia Institute of Technology,  
14 901 Atlantic Dr NW, Atlanta, GA 30318, USA

15  
16 <sup>4</sup>Department of Chemistry and Biochemistry, University of California, Santa Cruz, California  
17 95064, USA

18  
19 <sup>5</sup>Present address: German Center for Neurodegenerative Diseases (DZNE), Von-Siebold Straße  
20 3A, 37075 Göttingen, Germany

21  
22 <sup>6</sup>Present address: Immunology Research Program, Henry Ford Cancer Institute, Henry Ford  
23 Health, Detroit, MI, 48202, USA.

24  
25 <sup>7</sup>Lead contact

26 †These authors contributed equally to this work.

27 \*Correspondence: [nikolaos.sgourakis@pennmedicine.upenn.edu](mailto:nikolaos.sgourakis@pennmedicine.upenn.edu)

28  
29  
30 Supplementary Tables 1-5

31 Supplementary Figures 1-18

32

33 **Supplementary Table 1.** List of isotopically labeled NMR samples used in this study.

| Sample | Isotopic Labeling for HLA-A*01:01                                                  | Isotopic Labeling for NRAS <sup>Q61K</sup> / h $\beta$ <sub>2</sub> m                        | 3D NMR Experiments                                                                                                                                                                                                                                                                                                                                                                          |
|--------|------------------------------------------------------------------------------------|----------------------------------------------------------------------------------------------|---------------------------------------------------------------------------------------------------------------------------------------------------------------------------------------------------------------------------------------------------------------------------------------------------------------------------------------------------------------------------------------------|
| S1     | <i>U</i> -[ <sup>2</sup> H, <sup>13</sup> C, <sup>15</sup> N] ILV*                 | NA / NA                                                                                      | HNCA<br>HN(CA)CB<br>HNCO<br>HMCM[CG]CBCA                                                                                                                                                                                                                                                                                                                                                    |
| S2     | <i>U</i> -[ <sup>2</sup> H, <sup>12</sup> C, <sup>15</sup> N] AILV <sup>#</sup>    | NA / NA                                                                                      | H <sub>all</sub> -NH <sub>N</sub> SOFAST NOESY<br>N-NH <sub>N</sub> SOFAST NOESY<br>H <sub>all</sub> -C <sub>M</sub> H <sub>M</sub> SOFAST NOESY<br>C <sub>M</sub> -C <sub>M</sub> H <sub>M</sub> SOFAST NOESY<br>H <sub>N</sub> -C <sub>M</sub> H <sub>M</sub> SOFAST NOESY<br>C <sub>M</sub> -NH <sub>N</sub> SOFAST NOESY<br><sup>13</sup> C, <sup>15</sup> N-Filtered/Edited NOESY HSQC |
| S3     | <i>U</i> -[ <sup>2</sup> H, <sup>12</sup> C, <sup>15</sup> N] AILV <sup>FY</sup> ‡ | <i>U</i> -[ <sup>15</sup> N] / <i>U</i> -[ <sup>14</sup> N, <sup>12</sup> C, <sup>2</sup> H] | H <sub>all</sub> -NH <sub>N</sub> SOFAST NOESY<br>H <sub>all</sub> -C <sub>M</sub> H <sub>M</sub> SOFAST NOESY<br>C <sub>Aro</sub> -C <sub>M</sub> H <sub>M</sub> SOFAST NOESY<br>C <sub>Aro</sub> -NH <sub>N</sub> SOFAST NOESY<br>H <sub>M</sub> -C <sub>Aro</sub> H <sub>Aro</sub> SOFAST NOESY                                                                                          |

NA = Natural abundance

h $\beta$ <sub>2</sub>m = human  $\beta$ <sub>2</sub>-microglobulin

ILV\* = Ile <sup>13</sup>CH<sub>3</sub> for  $\delta$ 1 only; Leu <sup>13</sup>CH<sub>3</sub>/<sup>12</sup>C<sup>2</sup>H<sub>3</sub>; Val <sup>13</sup>CH<sub>3</sub>/<sup>12</sup>C<sup>2</sup>H<sub>3</sub>

AILV<sup>#</sup> = Ala <sup>13</sup>C $\beta$ ; Ile <sup>13</sup>C $\delta$ 1; Leu <sup>13</sup>C $\delta$ 1/<sup>13</sup>C $\delta$ 2; Val <sup>13</sup>C $\gamma$ 1/<sup>13</sup>C $\gamma$ 2

AILV<sup>FY</sup>‡ = Ala <sup>13</sup>C $\beta$ ; Ile <sup>13</sup>C $\delta$ 1; Leu <sup>13</sup>C $\delta$ 1/<sup>13</sup>C $\delta$ 2; Val <sup>13</sup>C $\gamma$ 1/<sup>13</sup>C $\gamma$ 2; Phe <sup>13</sup>C, <sup>15</sup>N; Tyr <sup>13</sup>C, <sup>15</sup>N

34

35 **Supplementary Table 2.** Intermolecular NOE contacts between the HLA-A\*01:01 groove and  
 36 the NRAS<sup>Q61K</sup> peptide obtained from various 3D NOESY NMR experiments.

| Contact no. | HLA-A*01:01 Groove |        | Peptide |        | NOESY experiment                              |                                                   |                                   |
|-------------|--------------------|--------|---------|--------|-----------------------------------------------|---------------------------------------------------|-----------------------------------|
|             | Residue            | Atom** | Residue | Atom** | H <sub>M</sub> -C <sub>M</sub> H <sub>M</sub> | H <sub>M</sub> -C <sub>Aro</sub> H <sub>Aro</sub> | H <sub>All</sub> -NH <sub>N</sub> |
| 1           | 59                 | HE1    | 1       | 1HD1   | -                                             | ✓                                                 | -                                 |
| 2           | 167                | H      | 1       | 1HD1   | -                                             | -                                                 | ✓                                 |
| 3           | 67                 | H      | 2       | 1HD1   | -                                             | -                                                 | ✓                                 |
| 4           | 159                | HD1    | 3       | 1HB    | -                                             | ✓                                                 | -                                 |
| 5           | 159                | HE1    | 3       | 1HB    | -                                             | ✓                                                 | -                                 |
| 6           | 159                | HD1    | 3       | 2HB    | -                                             | ✓                                                 | -                                 |
| 7           | 159                | HE1    | 3       | 2HB    | -                                             | ✓                                                 | -                                 |
| 8           | 67                 | H      | 4       | 3HG    | -                                             | -                                                 | ✓                                 |
| 9           | 69                 | H      | 4       | 3HG    | -                                             | -                                                 | ✓                                 |
| 10          | 69                 | 3HB    | 5       | 3HB    | ✓                                             | -                                                 | -                                 |
| 11          | 69                 | H      | 5       | 3HB    | -                                             | -                                                 | ✓                                 |
| 12          | 70                 | H      | 5       | 3HB    | -                                             | -                                                 | ✓                                 |
| 13          | 150                | 1HG1   | 7       | 1HE    | ✓                                             | -                                                 | -                                 |
| 14          | 150                | 1HG2   | 7       | 1HE    | ✓                                             | -                                                 | -                                 |
| 15          | 150                | 1HG1   | 7       | 1HG    | ✓                                             | -                                                 | -                                 |
| 16          | 150                | 1HG2   | 7       | 1HG    | ✓                                             | -                                                 | -                                 |
| 17          | 150                | 1HG1   | 7       | 2HE    | ✓                                             | -                                                 | -                                 |
| 18          | 150                | 1HG2   | 7       | 2HE    | ✓                                             | -                                                 | -                                 |
| 19          | 150                | 1HG1   | 7       | 2HG    | ✓                                             | -                                                 | -                                 |
| 20          | 150                | 1HG2   | 7       | 2HG    | ✓                                             | -                                                 | -                                 |
| 21          | 97                 | 1HD1   | 8       | 1HB    | ✓                                             | -                                                 | -                                 |
| 22          | 97                 | 1HD1   | 8       | 2HB    | ✓                                             | -                                                 | -                                 |
| 23          | 81                 | 1HD1   | 10      | HD1    | ✓                                             | -                                                 | -                                 |
| 24          | 81                 | 1HD2   | 10      | HD1    | ✓                                             | -                                                 | -                                 |
| 25          | 95                 | 1HD1   | 10      | HD1    | ✓                                             | -                                                 | -                                 |

37 \*\*Stereo-specific assignments were performed with basis on refinements considering each  
 38 possible iteration (calculation).

39 **Supplementary Table 3.** NMR restraints and structural statistics for the NRAS<sup>Q61K</sup>/HLA-  
 40 A\*01:01/ $\beta$ <sub>2m</sub> complex.

| <b>NRAS<sup>Q61K</sup>/HLA-A*01:01/h<math>\beta</math><sub>2m</sub></b> |      |
|-------------------------------------------------------------------------|------|
| <b>NMR distance and dihedral constraints</b>                            |      |
| Distance constraints                                                    |      |
| Total NOE                                                               | 957  |
| Intra-residue                                                           | 932  |
| Inter-residue                                                           | 25   |
| Total dihedral angle restraints                                         |      |
| $\phi$                                                                  | -    |
| $\psi$                                                                  | -    |
| <b>Structure Statistics</b>                                             |      |
| Violations > 1.5 Å                                                      | 0    |
| Distance constraints (Å)                                                | 25   |
| Dihedral angle constraints (°)                                          | -    |
| Max. dihedral angle violation (°)                                       | -    |
| Max. distance constraint violation (Å)                                  | 0.5  |
| Deviations from idealized geometry                                      |      |
| Bond lengths (Å)                                                        | 0.0  |
| Bond angles (°)                                                         | 0    |
| Improper (°)                                                            | 0    |
| Average pairwise r.m.s. deviation** (Å)                                 |      |
| Heavy                                                                   | 0.59 |
| Backbone                                                                | 1.75 |

41 \*\*Pairwise r.m.s. deviation was calculated among **10** refined structures.

42 Ramachandran statistics: Favored 95.3%; Allowed 4.7%; Disallowed 0.0%.

43 **Supplementary Table 4.** Evaluation of NOE contacts in MD simulation trajectories of  
 44 NRAS<sup>Q61K</sup>/HLA-A\*01:01.

| Contact no. | HLA-A*01:01 Groove |        | Peptide |        | Frames with NOE Violation (>6 Å) |                   |
|-------------|--------------------|--------|---------|--------|----------------------------------|-------------------|
|             | Residue            | Atom** | Residue | Atom** | % with violation                 | Average violation |
| 1           | 59                 | HE1    | 1       | 1HD1   | 19.13%                           | 1.70 Å            |
| 2           | 167                | H      | 1       | 1HD1   | 71.53%                           | 2.12 Å            |
| 3           | 67                 | H      | 2       | 1HD1   | 1.93%                            | 0.63 Å            |
| 4           | 159                | HD1    | 3       | 1HB    | 0.00%                            | N/A               |
| 5           | 159                | HE1    | 3       | 1HB    | 0.33%                            | 0.22 Å            |
| 6           | 159                | HD1    | 3       | 2HB    | 0.00%                            | N/A               |
| 7           | 159                | HE1    | 3       | 2HB    | 0.00%                            | N/A               |
| 8           | 67                 | H      | 4       | 3HG    | 99.73%                           | 4.45 Å            |
| 9           | 69                 | H      | 4       | 3HG    | 99.53%                           | 4.06 Å            |
| 10          | 69                 | 3HB    | 5       | 3HB    | 22.83%                           | 2.10 Å            |
| 11          | 69                 | H      | 5       | 3HB    | 48.90%                           | 2.72 Å            |
| 12          | 70                 | H      | 5       | 3HB    | 41.70%                           | 2.16 Å            |
| 13          | 150                | 1HG1   | 7       | 1HE    | 88.63%                           | 5.41 Å            |
| 14          | 150                | 1HG2   | 7       | 1HE    | 82.80%                           | 5.28 Å            |
| 15          | 150                | 1HG1   | 7       | 1HG    | 89.57%                           | 4.98 Å            |
| 16          | 150                | 1HG2   | 7       | 1HG    | 82.13%                           | 4.65 Å            |
| 17          | 150                | 1HG1   | 7       | 2HE    | 83.53%                           | 5.71 Å            |
| 18          | 150                | 1HG2   | 7       | 2HE    | 81.70%                           | 5.48 Å            |
| 19          | 150                | 1HG1   | 7       | 2HG    | 81.17%                           | 5.17 Å            |
| 20          | 150                | 1HG2   | 7       | 2HG    | 76.87%                           | 4.77 Å            |
| 21          | 97                 | 1HD1   | 8       | 1HB    | 88.70%                           | 3.41 Å            |
| 22          | 97                 | 1HD1   | 8       | 2HB    | 72.23%                           | 3.17 Å            |
| 23          | 81                 | 1HD1   | 10      | HD1    | 0.10%                            | 1.25 Å            |
| 24          | 81                 | 1HD2   | 10      | HD1    | 0.10%                            | 1.29 Å            |
| 25          | 95                 | 1HD1   | 10      | HD1    | 6.00%                            | 1.43 Å            |

45 \*\*Stereo-specific assignments were performed with basis on refinements considering each  
 46 possible iteration (calculation).

47 **Supplementary Table 5.** HDX data summary for peptide-free, NRAS<sup>Q61K</sup>, NRAS<sup>Q61</sup>, NRAS<sup>Q61H</sup>,  
 48 NRAS<sup>Q61L</sup>, and NRAS<sup>Q61R</sup> peptide-loaded HLA-A\*01:01/hβ2m complexes.

| Data Set                                                       | peptide-free (empty) HLA-A*01:01                                                     | NRAS <sup>Q61K</sup> peptide-bound HLA-A*01:01                                       | NRAS <sup>Q61</sup> peptide-bound HLA-A*01:01                                            | NRAS <sup>Q61H</sup> peptide-bound HLA-A*01:01                                         | NRAS <sup>Q61L</sup> peptide-bound HLA-A*01:01                                         | NRAS <sup>Q61R</sup> peptide-bound HLA-A*01:01                                         |
|----------------------------------------------------------------|--------------------------------------------------------------------------------------|--------------------------------------------------------------------------------------|------------------------------------------------------------------------------------------|----------------------------------------------------------------------------------------|----------------------------------------------------------------------------------------|----------------------------------------------------------------------------------------|
| HDX reaction details                                           | 50 mM NaCl, 20 mM sodium phosphate, pD <sub>read</sub> = 6.50, 25 °C                 | 50 mM NaCl, 20 mM sodium phosphate, pD <sub>read</sub> = 6.50, 25 °C                 | 50 mM NaCl, 20 mM sodium phosphate, pD <sub>read</sub> = 6.50, 25 °C                     | 50 mM NaCl, 20 mM sodium phosphate, pD <sub>read</sub> = 6.50, 25 °C                   | 50 mM NaCl, 20 mM sodium phosphate, pD <sub>read</sub> = 6.50, 25 °C                   | 50 mM NaCl, 20 mM sodium phosphate, pD <sub>read</sub> = 6.50, 25 °C                   |
| HDX time course (sec)                                          | 0, 20, 60, 180, 600                                                                  | 0, 20, 60, 180, 600                                                                  | 0, 20, 60, 180, 600                                                                      | 0, 20, 60, 180, 600                                                                    | 0, 20, 60, 180, 600                                                                    | 0, 20, 60, 180, 600                                                                    |
| HDX control samples                                            | Maximally-labeled control where samples were heated to 35°C for 15 mins              | Maximally-labeled control where samples were heated to 46°C for 15 mins              | Maximally-labeled control where samples were heated to 46°C for 15 mins                  | Maximally-labeled control where samples were heated to 46°C for 15 mins                | Maximally-labeled control where samples were heated to 46°C for 15 mins                | Maximally-labeled control where samples were heated to 46°C for 15 mins                |
| Back-exchange (mean / IQR)                                     | 59.75%/16.69%                                                                        | 52.89%/19.60%                                                                        | 55.82%/20.84%                                                                            | 54.65%/20.69%                                                                          | 52.74%/19.13%                                                                          | 53.64%/19.18%                                                                          |
| # of Peptides                                                  | 336                                                                                  | 365                                                                                  | 343                                                                                      | 309                                                                                    | 300                                                                                    | 337                                                                                    |
| Sequence coverage                                              | 99%                                                                                  | 99%                                                                                  | 99%                                                                                      | 99%                                                                                    | 99%                                                                                    | 99%                                                                                    |
| Average peptide length                                         | 15.85                                                                                | 15.47                                                                                | 16.50                                                                                    | 15.61                                                                                  | 15.40                                                                                  | 15.26                                                                                  |
| Replicates (biological or technical)                           | 3 (biological)                                                                       | 3 (biological)                                                                       | 3 (biological)                                                                           | 3 (biological)                                                                         | 3 (biological)                                                                         | 3 (biological)                                                                         |
| Repeatability in % Deuterium Uptake                            | 8.39%(20s, 0.0839D), 6.66%(60s, 0.0666D), 9.38%(180s, 0.0938D), 5.24%(600s, 0.0524D) | 9.42%(20s, 0.0942D), 9.90%(60s, 0.0990D), 7.74%(180s, 0.0774D), 8.73%(600s, 0.0873D) | 11.22%(20s, 0.1122D), 11.51%(60s, 0.1151D), 12.20%(180s, 0.1220D), 11.15%(600s, 0.1115D) | 12.68%(20s, 0.1268D), 11.63%(60s, 0.1163D), 8.38%(180s, 0.0838D), 7.80%(600s, 0.0780D) | 25.15%(20s, 0.2515D), 10.47%(60s, 0.1047D), 6.70%(180s, 0.0670D), 6.60%(600s, 0.0660D) | 9.68%(20s, 0.0968D), 10.67%(60s, 0.1067D), 10.77%(180s, 0.1077D), 9.18%(600s, 0.0918D) |
| Significant differences in HDX (delta HDX > X D, Average+1 SD) | 0.297D                                                                               |                                                                                      |                                                                                          |                                                                                        |                                                                                        |                                                                                        |

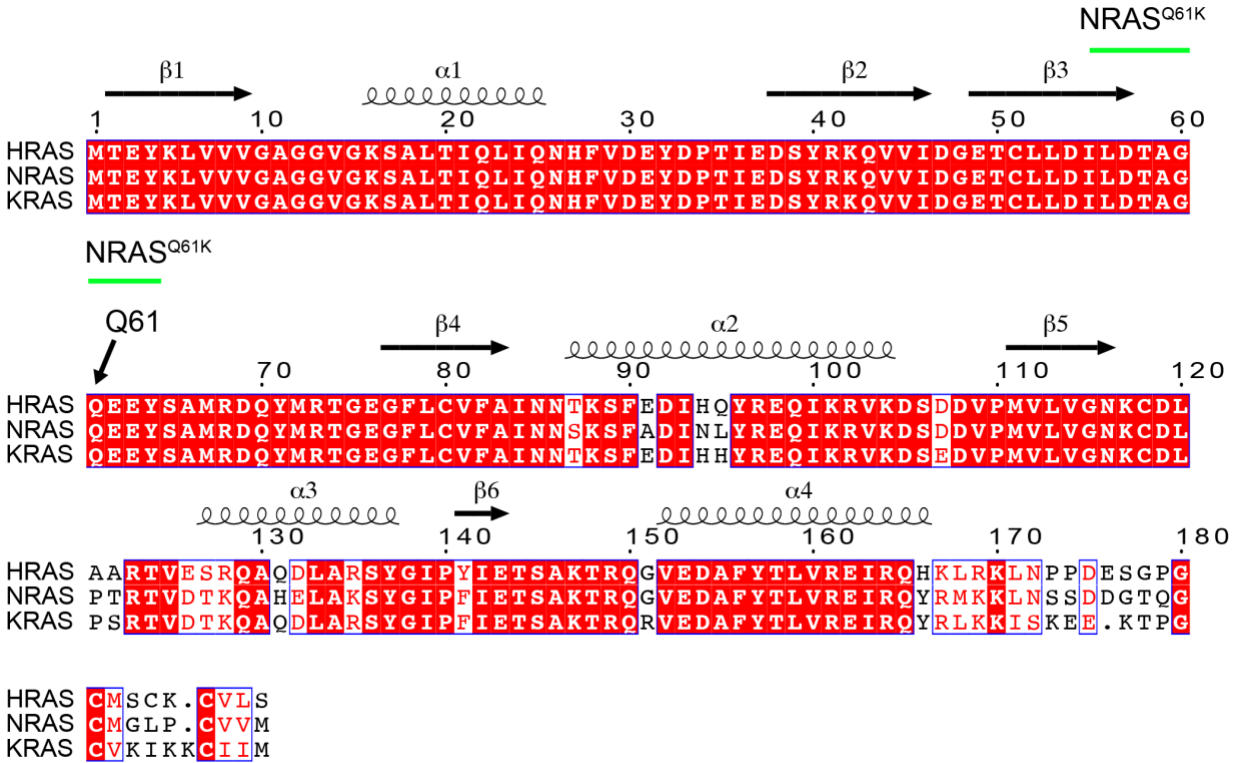

49

50

51

52

53

54

55

56

**Supplementary Figure 1. Sequence alignment of the RAS family of proteins and conservation of the 55-64 epitope.** Sequence alignment of human HRAS (UniProtKB: P01112, Isoform 1), NRAS (UniProtKB: P01111), and KRAS (UniProtKB: P01116, Isoform 2A) performed using Clustal Omega v1.2.4 and processed with ESPrnt v3. Residues in red boxes are conserved. An arrow points to the position of the conserved Q61 residue, which is often mutated in neuroblastoma and melanoma. The green bar highlights the position of the NRAS<sup>Q61K</sup> neoepitope (ILDITAG<sup>KEEY</sup>) within the conserved RAS<sup>55-64</sup> sequence.

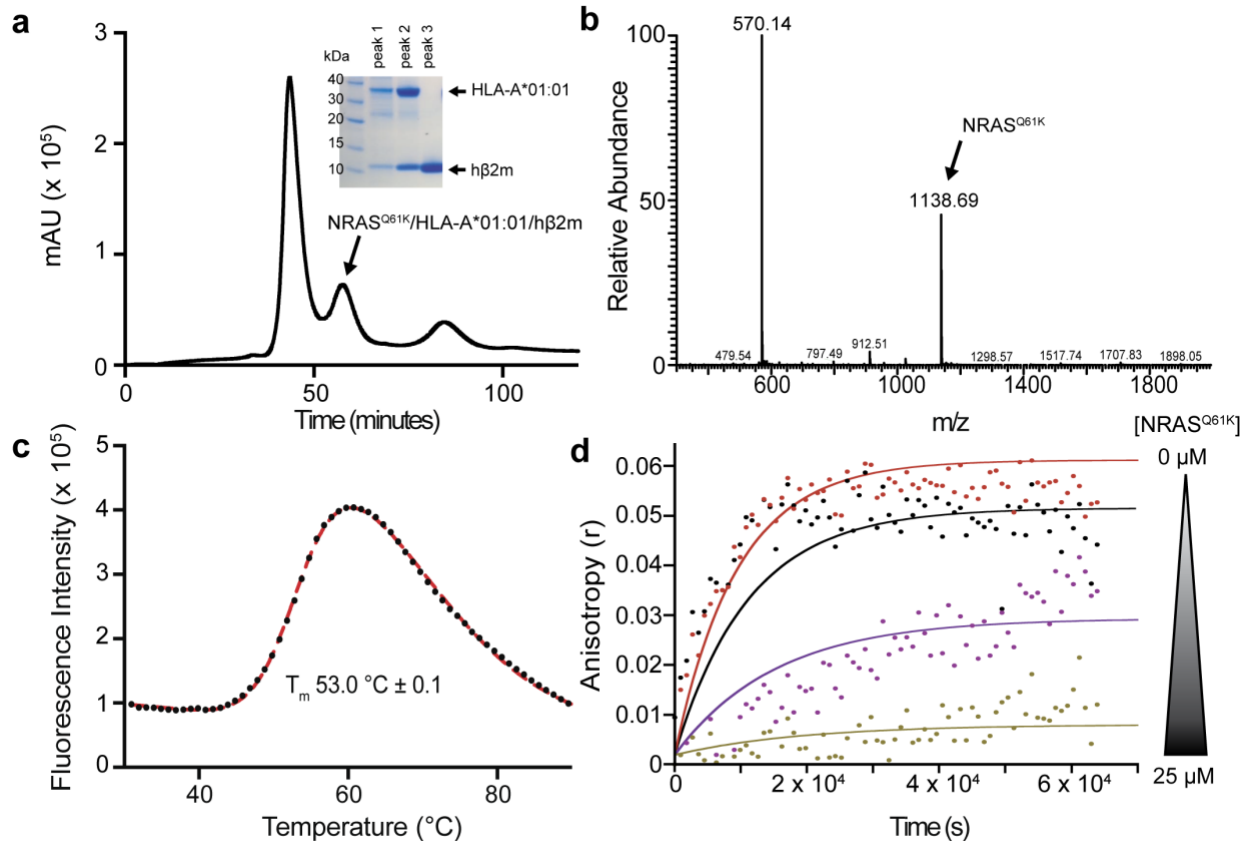

57  
 58 **Supplementary Figure 2. Purification and characterization of the NRAS<sup>Q61K</sup>/HLA-**  
 59 **A\*01:01/hβ<sub>2</sub>m complex.** **a** SEC traces of NRAS<sup>Q61K</sup>/HLA-A\*01:01/hβ<sub>2</sub>m complex prepared by  
 60 *in vitro* refolding. Purification was performed on a HiLoad 16/600 Superdex 75 pg column at a  
 61 flow rate of 1 mL/min. Eluted fractions were probed using SDS-PAGE analysis followed by  
 62 Coomassie staining (inset). Bands occurred at expected molecular weights for HLA-A\*01:01 (32.2  
 63 kDa) and hβ<sub>2</sub>m (11.8 kDa). **b** LC-MS of purified NRAS<sup>Q61K</sup>/HLA-A\*01:01/hβ<sub>2</sub>m complex  
 64 revealing the presence of NRAS<sup>Q61K</sup> (observed mass 1,138.69 Da; expected mass 1,138.22 Da)  
 65 eluted from HLA-A\*01:01. **c** DSF performed on 7 μM NRAS<sup>Q61K</sup>/HLA-A\*01:01/hβ<sub>2</sub>m complex,  
 66 which exhibits a thermal stability of 53.0 °C. The dotted red line is the fit of the data in Graph Pad  
 67 Prism v9. Data is mean ± SD for n=3 technical replicates. **d** Fluorescence anisotropy (r) of 25 nM  
 68 TAMRA-NRAS<sup>Q61K</sup> in the presence of 4 μM unlabeled NRAS<sup>Q61K</sup>/HLA-A\*01:01/hβ<sub>2</sub>m and  
 69 varying concentrations of unlabeled competitor NRAS<sup>Q61K</sup> peptide [NRAS<sup>Q61K</sup>]. [NRAS<sup>Q61K</sup>]  
 70 shown in μM units are 0.0 (red), 0.25 (black), 4.0 (purple), and 25 (yellow). The data were  
 71 analyzed by global fitting using Dynafit 4 (<http://www.biokin.com/dynafit>). IC<sub>50</sub> of NRAS<sup>Q61K</sup>  
 72 binding to HLA-A\*01:01/hβ<sub>2</sub>m is estimated as 260 nM.





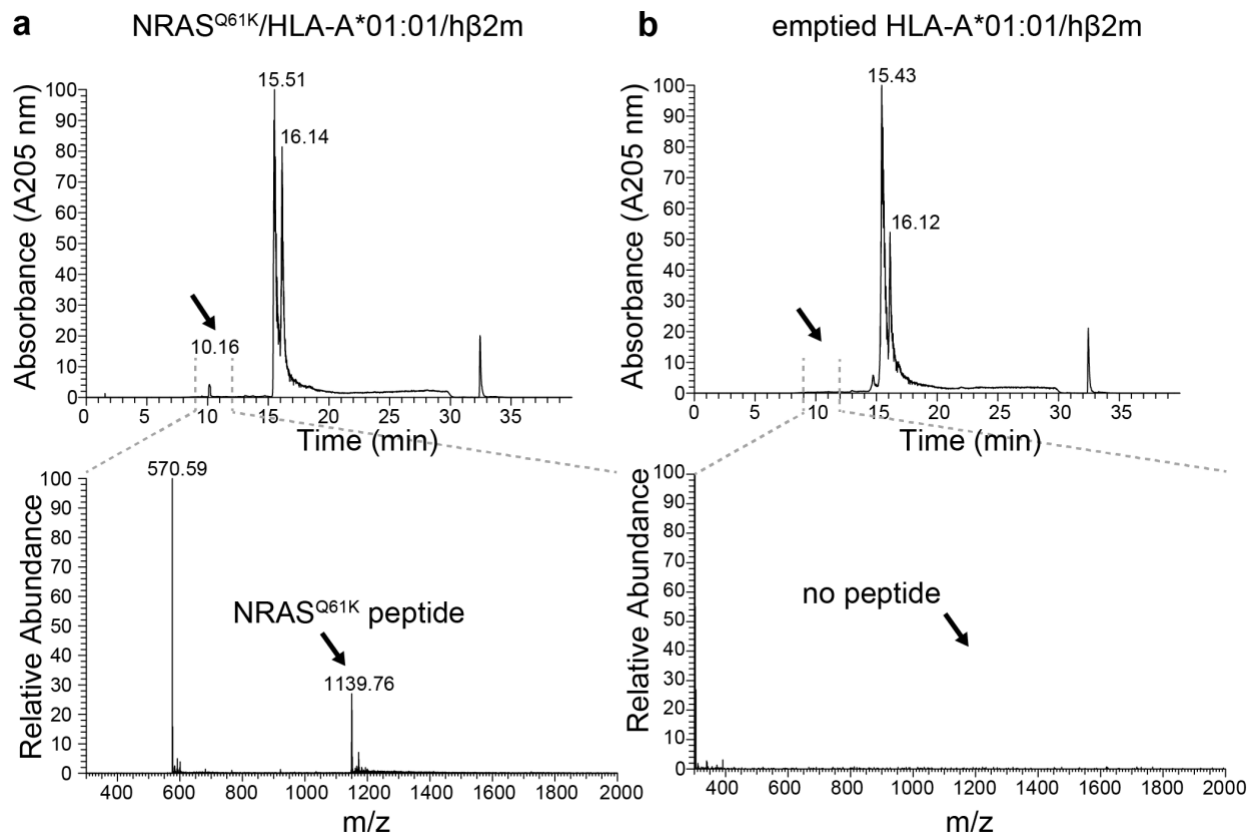

89  
 90 **Supplementary Figure 4. LC-MS confirmation of generation of peptide-deficient HLA-**  
 91 **A\*01:01/hβ<sub>2</sub>m by basic elution. a** *In vitro* refolded NRAS<sup>Q61K</sup>/HLA-A\*01:01/hβ<sub>2</sub>m. The  
 92 presence of NRAS<sup>Q61K</sup> is noted (observed mass 1,139.76 Da; expected mass 1138.22 Da). **b**  
 93 Emptied/HLA-A\*01:01/hβ<sub>2</sub>m, generated by basic elution at pH 12.5 (see Methods section). No  
 94 peptide is observed (expected mass 1138.22 Da). Top panel: the LC chromatogram trace of each  
 95 sample showing relative absorbance at A205 nm vs time. Bottom panel: Average relative  
 96 abundance for the selected time interval (dotted gray lines) and the corresponding m/z.

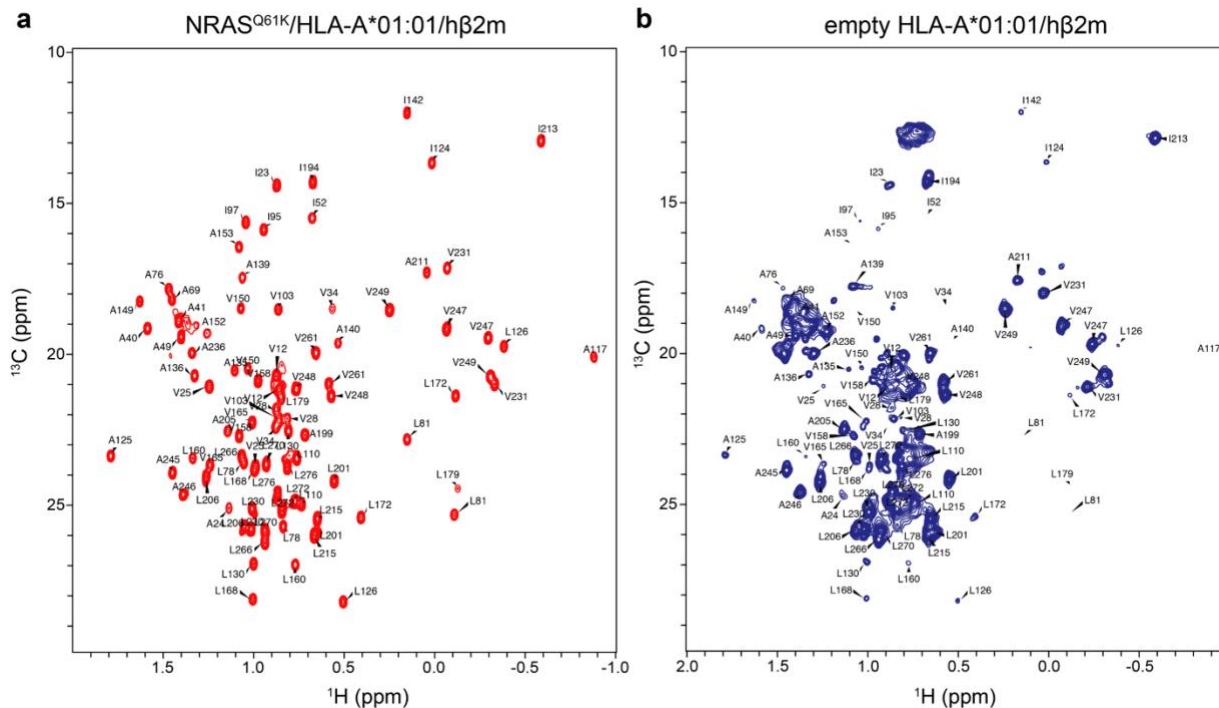

97  
 98 **Supplementary Figure 5. Comparison of methyl NMR spectra of peptide-loaded and emptied**  
 99 **HLA-A\*01:01. a** 2D <sup>1</sup>H-<sup>13</sup>C methyl HMQC of 50 μM of AILV labeled HLA-A\*01:01 bound to  
 100 natural isotopic abundance NRAS<sup>Q61K</sup> and hβ<sub>2</sub>m recorded at a <sup>1</sup>H field of 800 MHz at 25°C, with  
 101 150 μM excess natural isotopic abundance hβ<sub>2</sub>m added for stabilization of the complex. **b** 2D <sup>1</sup>H-  
 102 <sup>13</sup>C methyl HMQC of 50 μM of AILV labeled emptied HLA-A\*01:01 bound to natural isotopic  
 103 abundance hβ<sub>2</sub>m recorded at a <sup>1</sup>H field of 800 MHz at 25°C, with 150 μM excess natural isotopic  
 104 abundance hβ<sub>2</sub>m added for stabilization of the complex.

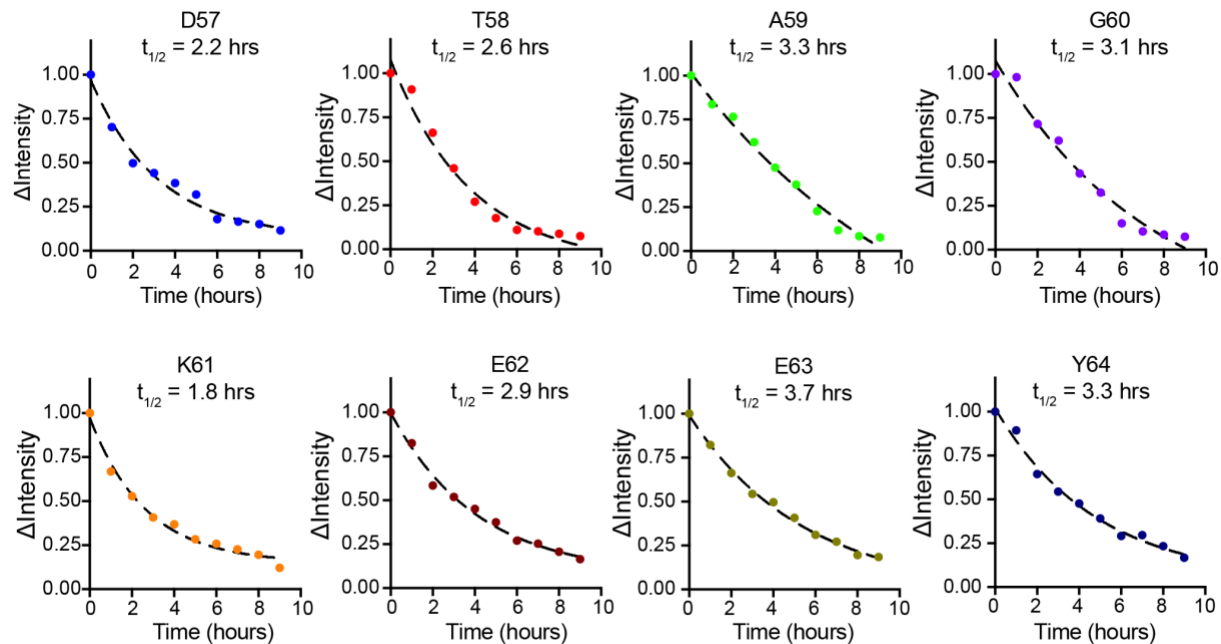

105  
 106 **Supplementary Figure 6. Assembly kinetics of  $^{15}\text{N}$  labeled NRAS<sup>Q61K</sup> peptide with emptied**  
 107 **HLA-A\*01:01.** The change in NMR signal intensity ( $\Delta$  Intensity) for each amide group of  $^{15}\text{N}$   
 108 labeled NRAS<sup>Q61K</sup> peptide as a function of incubation time with natural isotopic abundance  
 109 emptied HLA-A\*01:01/h $\beta$ 2m. Curves were fit to a single phase exponential decay in GraphPad  
 110 Prism v9 to determine half-life ( $t_{1/2}$ , hours).

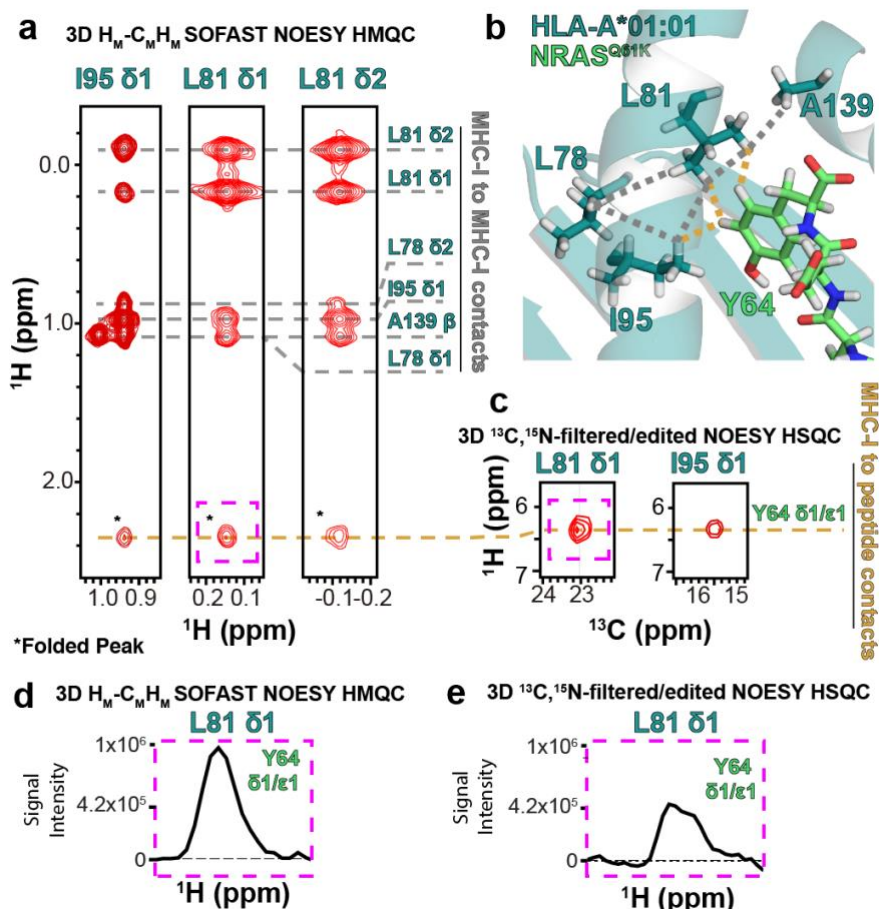

111  
 112 **Supplementary Figure 7. Comparison of NMR detection of intermolecular contacts between**  
 113 **HLA-A\*01:01 and NRAS<sup>Q61K</sup> peptide using SOFAST versus conventional filtered/edited**  
 114 **methods.** **a** A representative example of NOE-derived intermolecular contacts between AILV  
 115 methyl labeled HLA-A\*01:01 and natural abundance NRAS<sup>Q61K</sup> peptide. NMR cross-peaks that  
 116 are folded due to sweep width restrictions during data collection are indicated with an asterisk (\*).  
 117 NMR allows for measurement of short-range (< 6 Å) contacts between HLA-A\*01:01 atoms (dark  
 118 green) and NRAS<sup>Q61K</sup> atoms (light green). The purple dotted boxes highlight NMR peaks for  
 119 comparison in panel c. **b** Observed NOEs are shown on the NMR/Rosetta structure of  
 120 NRAS<sup>Q61K</sup>/HLA-A\*01:01/hβ<sub>2</sub>m. HLA-A\*01:01 residues are shown as dark green sticks and  
 121 NRAS<sup>Q61K</sup> residues are shown as light green sticks within a view of the MHC-I groove. NOEs are  
 122 represented with dotted gray lines (intramolecular HLA-A\*01:01 to HLA-A\*01:01 contacts) and  
 123 dotted orange lines (HLA-A\*01:01 to NRAS<sup>Q61K</sup> contacts). **c** The NOEs observed in 3D H<sub>M</sub>-C<sub>M</sub>H<sub>M</sub>  
 124 SOFAST NOESY HMQC experiments are corroborated by independent 3D <sup>13</sup>C, <sup>15</sup>N-  
 125 filtered/edited NOESY HSQC experiments. Strips are shown for L81 and I95 methyl groups of  
 126 HLA-A\*01:01 with an observed cross-peak with Y64 δ1/ε1 of NRAS<sup>Q61K</sup>. **d** and **e** One-dimension  
 127 slices of the <sup>1</sup>H dimension of the L81 δ1/Y64 δ1/ε1 cross-peaks, shown in the purple dotted box  
 128 of panel A, obtained from strips in **d** 3D H<sub>M</sub>-C<sub>M</sub>H<sub>M</sub> SOFAST NOESY HMQC recorded at a <sup>1</sup>H  
 129 field of 800 MHz at 25°C or **e** 3D <sup>13</sup>C, <sup>15</sup>N-filtered/edited NOESY HSQC experiments recorded at  
 130 a <sup>1</sup>H field of 600 MHz at 25°C. The SOFAST NOESY HMQC and filtered/edited NOESY HSQC  
 131 experiments were recorded at different magnetic fields and cannot be directly compared in terms  
 132 of signal-to-noise.

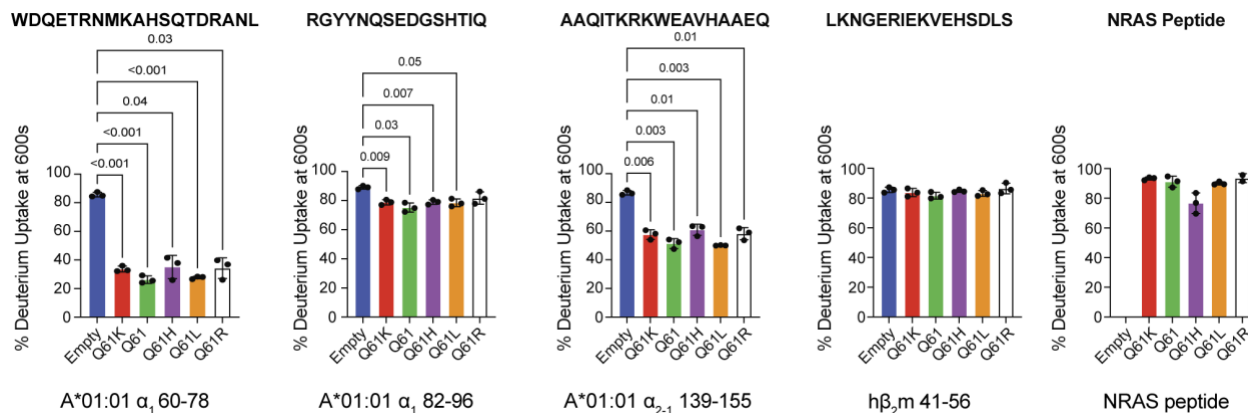

133  
 134 **Supplementary Figure 8. Comparison of the % deuterium uptake for representative peptide**  
 135 **fragments.** Average % deuterium uptake of peptide-free (empty), NRAS<sup>Q61K</sup>, NRAS<sup>Q61</sup>,  
 136 NRAS<sup>Q61H</sup>, NRAS<sup>Q61L</sup>, and NRAS<sup>Q61R</sup> peptide-loaded HLA-A\*01:01/hβ<sub>2</sub>m were extracted from  
 137 three independent protein sample preparation and HDX-MS experiments. In the comparison, the  
 138 Brown-Forsythe and Welch version of one-way ANOVA tests were performed for all proteins,  
 139 where 0.12 (ns), 0.033 (\*), 0.002 (\*\*), and < 0.001 (\*\*\*). Comparisons between any two %  
 140 deuterium uptakes that do not have asterisk labels are ns (not significant). Data are mean ± SD for  
 141 n=3 biological replicates.

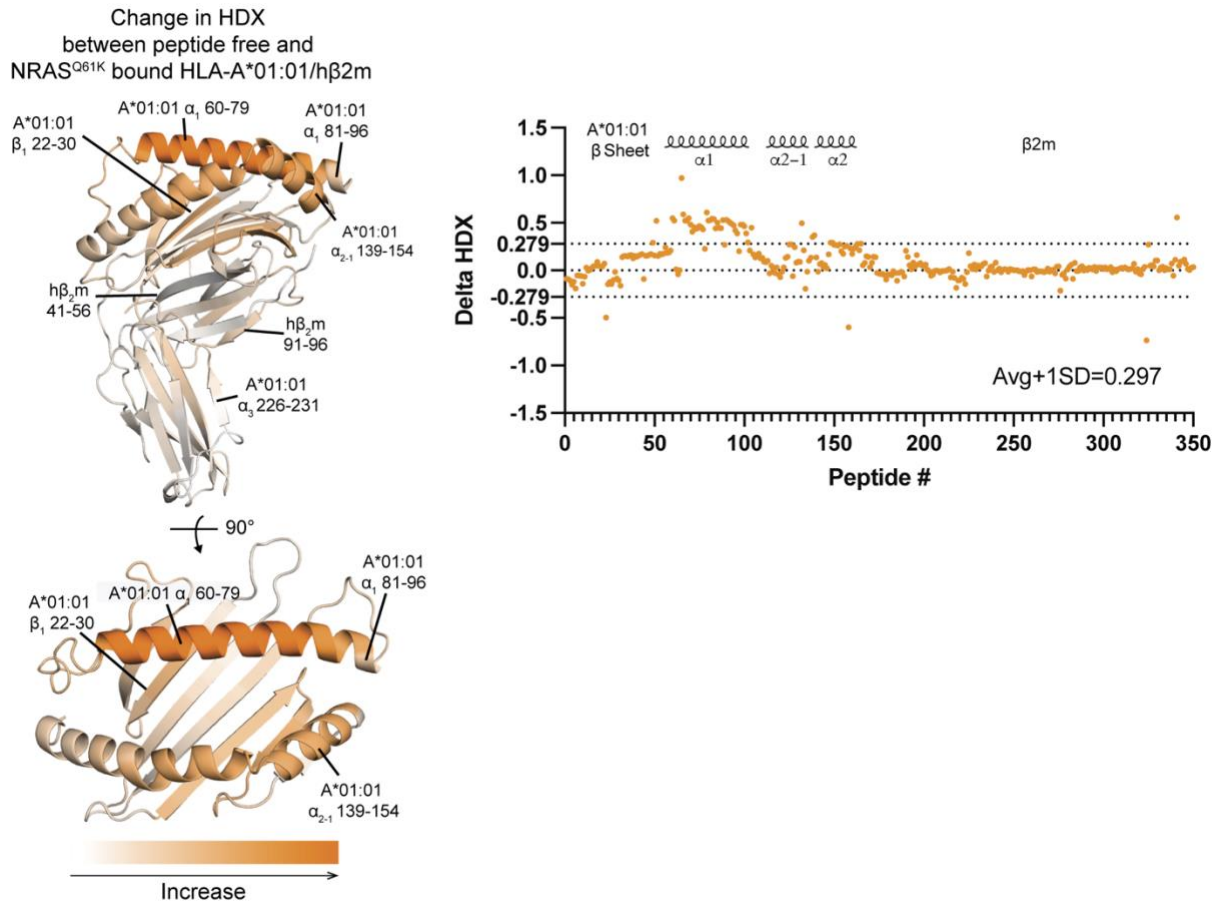

**Supplementary Figure 9. Change in HDX at 600 sec between peptide-free and NRAS<sup>Q61K</sup> bound HLA-A\*01:01/hβ<sub>2</sub>m complexes.** The HDX profiles of NRAS<sup>Q61K</sup>-loaded A\*01:01/hβ<sub>2</sub>m complexes are compared with their peptide-free counterparts (UV-irradiated photoA1/HLA-A\*01:01/hβ<sub>2</sub>m). The absolute value of the differences in % deuterium uptake between peptide-free and NRAS<sup>Q61K</sup>-loaded A\*01:01/hβ<sub>2</sub>m are resolved to individual peptide fragments and mapped on structure (PDB:6MPP) on a white to orange (increased difference) scale, where measured deuterium uptakes for peptide fragments at 600s were averaged to each amino acids based on the start and end position and the length of the peptide. The average % deuterium uptakes were calculated from three independent protein sample preparation and HDX-MS experiments. Positive and negative values indicate decreased or increased HDX of peptide-free A\*01:01/hβ<sub>2</sub>m relative to NRAS<sup>Q61K</sup>-loaded complexes. The peptides are arranged according to their position from the N- to C-terminal (Supplementary Table 8 for peptide order).

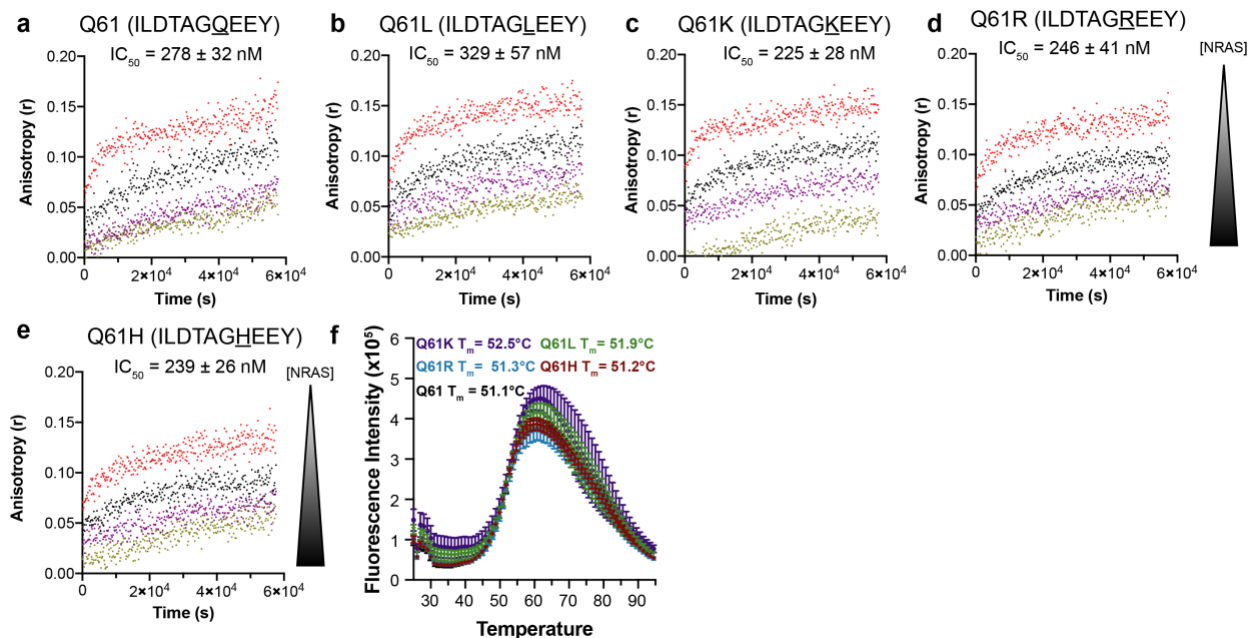

155  
 156 **Supplementary Figure 10. Comparison of NRAS Q61 mutant peptide binding and stability**  
 157 **with HLA-A\*01:01.** **a-e** Fluorescence anisotropy ( $r$ ) of 25 nM TAMRA-NRAS<sup>Q61K</sup> in the  
 158 presence of 4  $\mu\text{M}$  unlabeled NRAS<sup>Q61K</sup>/HLA-A\*01:01/h $\beta$ <sub>2</sub>m and varying concentrations of the  
 159 specific unlabeled competitor NRAS peptide. [NRAS] shown in  $\mu\text{M}$  units are 0.0 (red), 0.25  
 160 (black), 4.0 (purple), 25 (yellow). The data were analyzed by global fitting using Dynafit 4  
 161 (<http://www.biokin.com/dynafit>). Estimated  $IC_{50}$  values for each peptide binding to HLA-  
 162 A\*01:01/h $\beta$ <sub>2</sub>m are noted. Data is mean  $\pm$  SD for  $n=3$  technical replicates. **f** Differential scanning  
 163 fluorimetry experiments performed on 7  $\mu\text{M}$  photoA1/HLA-A\*01:01/h $\beta$ <sub>2</sub>m complex in the  
 164 presence of 10-fold molar excess of the specific NRAS peptide following 1 hour of UV-irradiation  
 165 at 365 nm. Fitted thermal melting temperatures are noted. Data is mean  $\pm$  SD for  $n=3$  technical  
 166 replicates. photoA1 peptide corresponds to STAPGJLEY, where J is 3-amino-3-(2-nitro)phenyl-  
 167 propionic acid.



empty HLA-A\*01:01

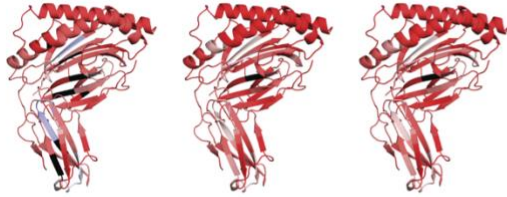

NRAS<sup>Q61K</sup>/HLA-A\*01:01

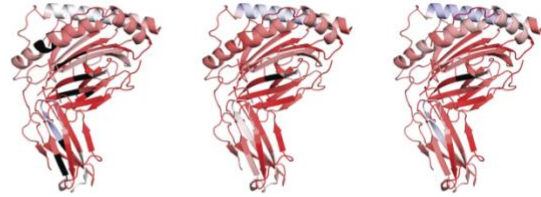

NRAS<sup>Q61</sup>/HLA-A\*01:01

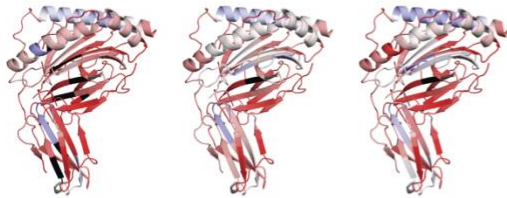

NRAS<sup>Q61H</sup>/HLA-A\*01:01

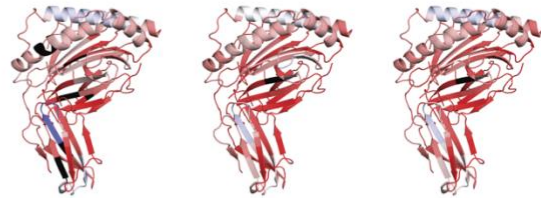

NRAS<sup>Q61L</sup>/HLA-A\*01:01

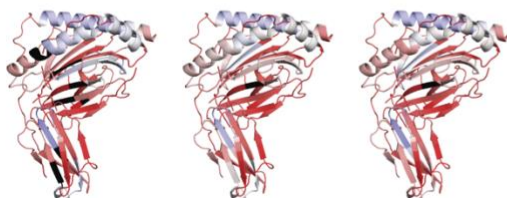

NRAS<sup>Q61R</sup>/HLA-A\*01:01

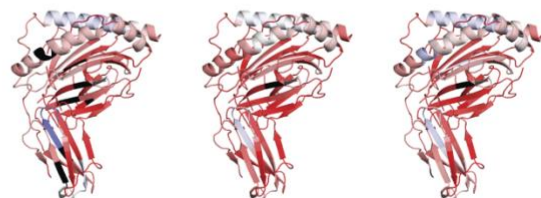

168

169

170

171

172

173

174

175

**Supplementary Figure 11. Structure view of % deuterium uptake at 600 sec (back-exchange corrected) for peptide-free, NRAS<sup>Q61K</sup>, NRAS<sup>Q61</sup>, NRAS<sup>Q61H</sup>, NRAS<sup>Q61L</sup>, and NRAS<sup>Q61R</sup> peptide-loaded HLA-A\*01:01/hβ<sub>2</sub>m.** Percent deuterium uptakes at 600 sec (back-exchange corrected) were plotted onto PDB IDB 6MPP. Color ranges from deep blue (no deuterium uptake) to red (100% deuterium uptake). Black indicates regions where peptides were not obtained. Percent deuterium uptakes at 600 sec (back-exchange corrected) were resolved to individual peptide fragments and obtained from each biological triplicate.

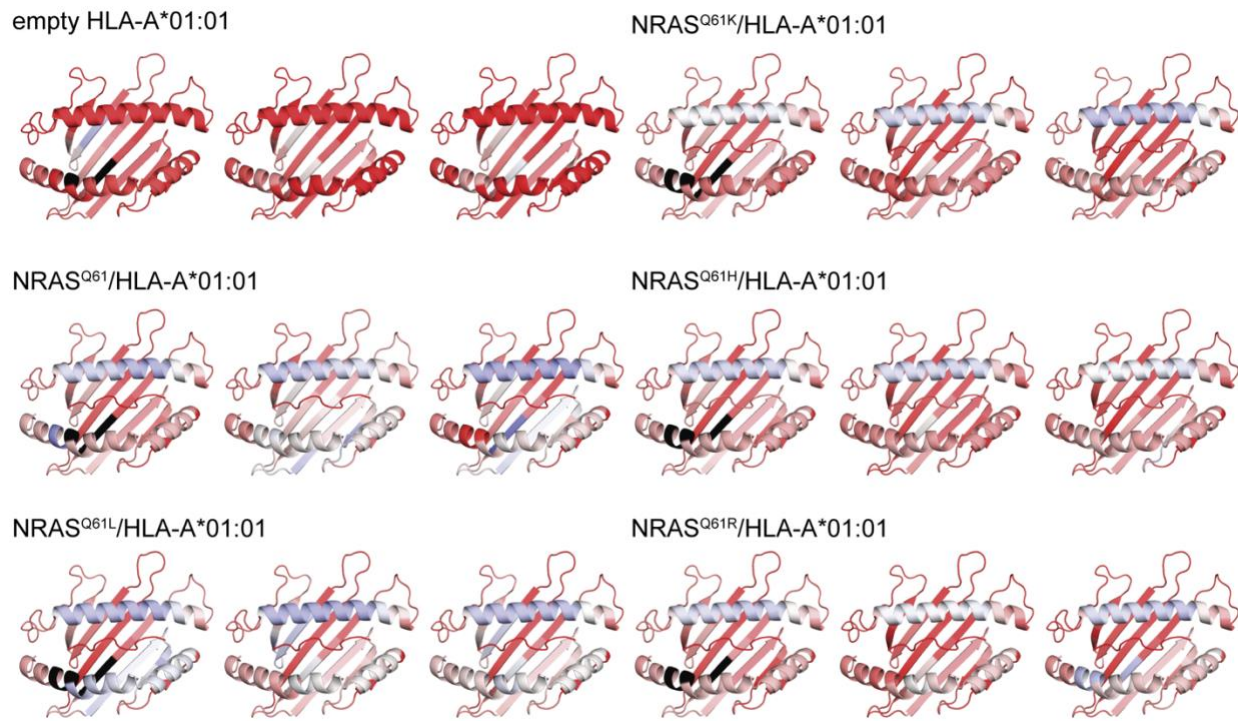

176  
 177 **Supplementary Figure 12. Structure view of % deuterium uptake at 600 sec (back-exchange**  
 178 **corrected) for the groove of the peptide-free, NRAS<sup>Q61K</sup>, NRAS<sup>Q61</sup>, NRAS<sup>Q61H</sup>, NRAS<sup>Q61L</sup>,**  
 179 **and NRAS<sup>Q61R</sup> peptide-loaded HLA-A\*01:01/hβ<sub>2</sub>m.** Percent deuterium uptakes at 600 sec  
 180 (back-exchange corrected) were plotted onto PDB IDB 6MPP. Color ranges from deep blue (no  
 181 deuterium uptake) to red (100% deuterium uptake). Percent deuterium uptakes at 600 sec (back-  
 182 exchange corrected) were resolved to individual peptide fragments and obtained from each  
 183 biological triplicate.

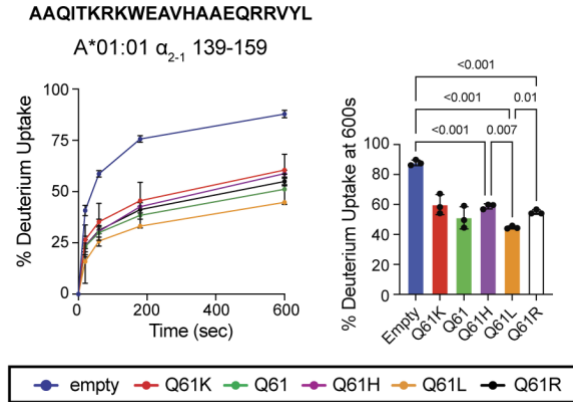

184  
 185 **Supplementary Figure 13. Comparison of the % deuterium uptake for the  $\alpha_{2-1}$  helix peptide**  
 186 **fragment 130-159.** Kinetic graphs of % deuterium uptake (back-exchange corrected) for the  $\alpha_{2-1}$   
 187 helix peptide fragment 130-159 as a function of HDX time (0, 20, 60, 180, or 600 sec) shown for  
 188 emptied (blue) versus HLA-A\*01:01/h $\beta_2$ m bound to different NRAS Q61 mutant peptides.  
 189 Average % deuterium uptake of peptide-free (empty), NRAS<sup>Q61K</sup>, NRAS<sup>Q61</sup>, NRAS<sup>Q61H</sup>,  
 190 NRAS<sup>Q61L</sup>, and NRAS<sup>Q61R</sup> peptide-loaded HLA-A\*01:01/h $\beta_2$ m were extracted from three  
 191 independent protein sample preparation and HDX-MS experiments. In the comparison, the Brown-  
 192 Forsythe and Welch version of one-way ANOVA tests were performed for all proteins, where 0.12  
 193 (ns), 0.033 (\*), 0.002 (\*\*), and < 0.001 (\*\*\*). Comparisons between any two % deuterium uptakes  
 194 that do not have asterisk labels are ns (not significant). Data are mean  $\pm$  SD for n=3 biological  
 195 replicates.

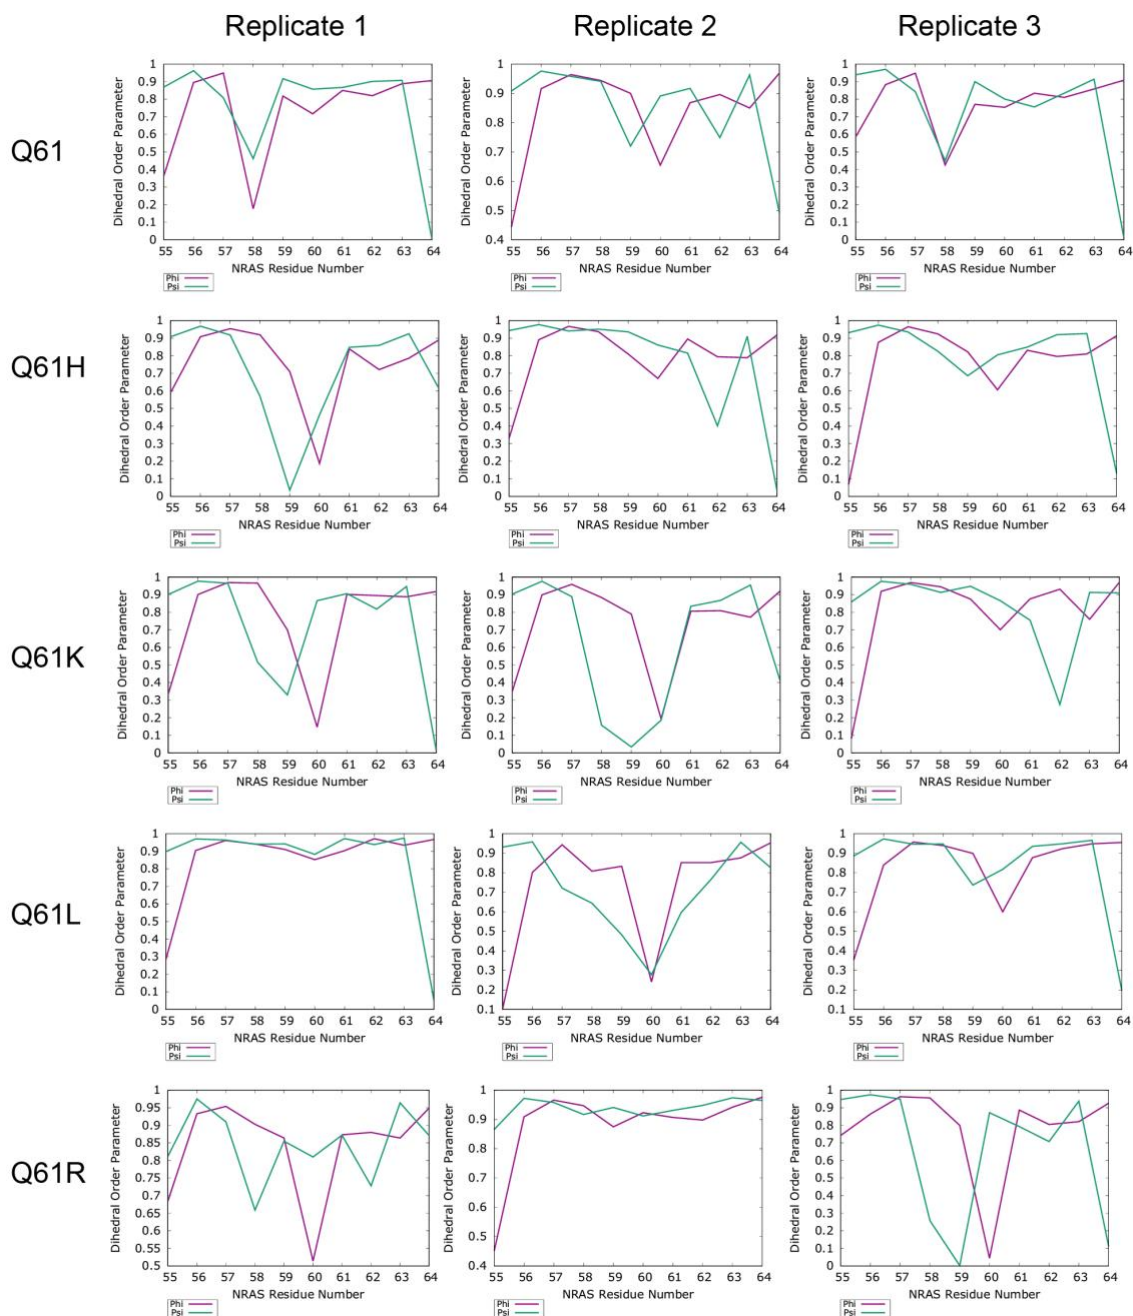

196  
 197 **Supplementary Figure 14. MD simulation derived  $\phi/\psi$  backbone dihedral order parameters**  
 198 **for different NRAS peptides within the HLA-A\*01:01 groove.** Comparison of  $\phi$  (phi)/ $\psi$ (psi)  
 199 backbone dihedral order parameters ( $S^2$ ) for each NRAS<sub>55-64</sub> peptide variant within the HLA-  
 200 A\*01:01 groove averaged over the entire 1  $\mu$ sec long MD simulations. All three replicates are  
 201 shown.  $S^2$  values were generated in GROMACS using the gm x chi command. Lower value  $S^2$   
 202 values are indicative of greater motion.

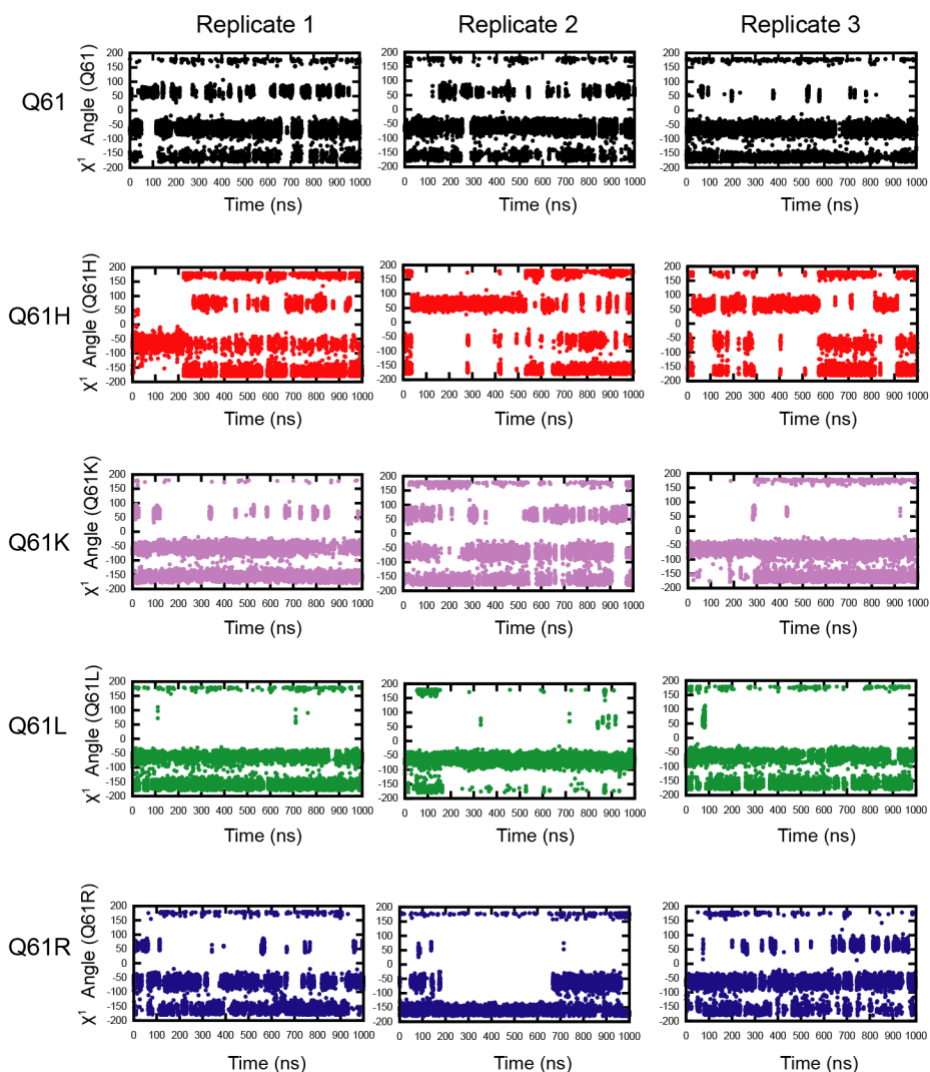

203  
 204 **Supplementary Figure 15. MD simulation derived  $\chi_1$  side chain angles of residue 61 for**  
 205 **different NRAS peptides within the HLA-A\*01:01 groove.** Comparison of  $\chi_1$  angle for residue  
 206 61 for each NRAS<sub>55-64</sub> peptide variant within the HLA-A\*01:01 groove across the entire 1  $\mu$ sec  
 207 long MD simulations. All three replicates are shown.  $\chi_1$  angles were determined in GROMACS  
 208 using the gmx chi command.

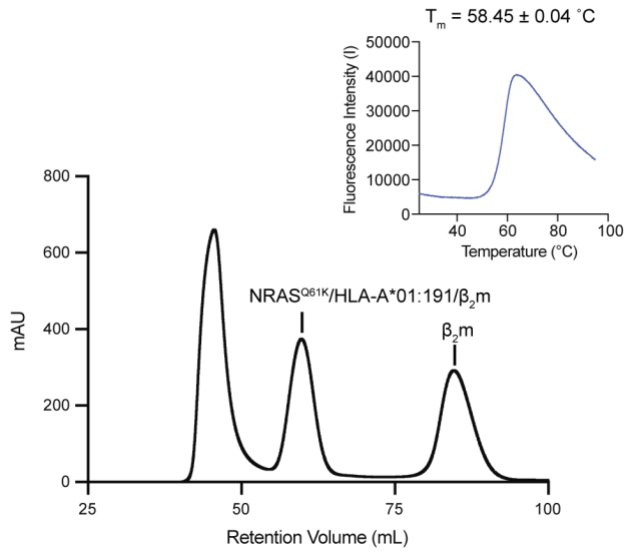

209  
 210 **Supplementary Figure 16. NRAS<sup>Q61K</sup> mutant peptide bind to HLA-A\*01:191, forming a**  
 211 **high-affinity protein complex. SEC traces of NRAS<sup>Q61K</sup> mutant peptide-loaded HLA-**  
 212 **\*01:191/hβ<sub>2</sub>m. The properly refolded pMHC-I peak (~62 minutes) is indicated and is further**  
 213 **confirmed by DSF analysis ( $T_m = 58.45 \text{ }^\circ\text{C}$ , blue).**

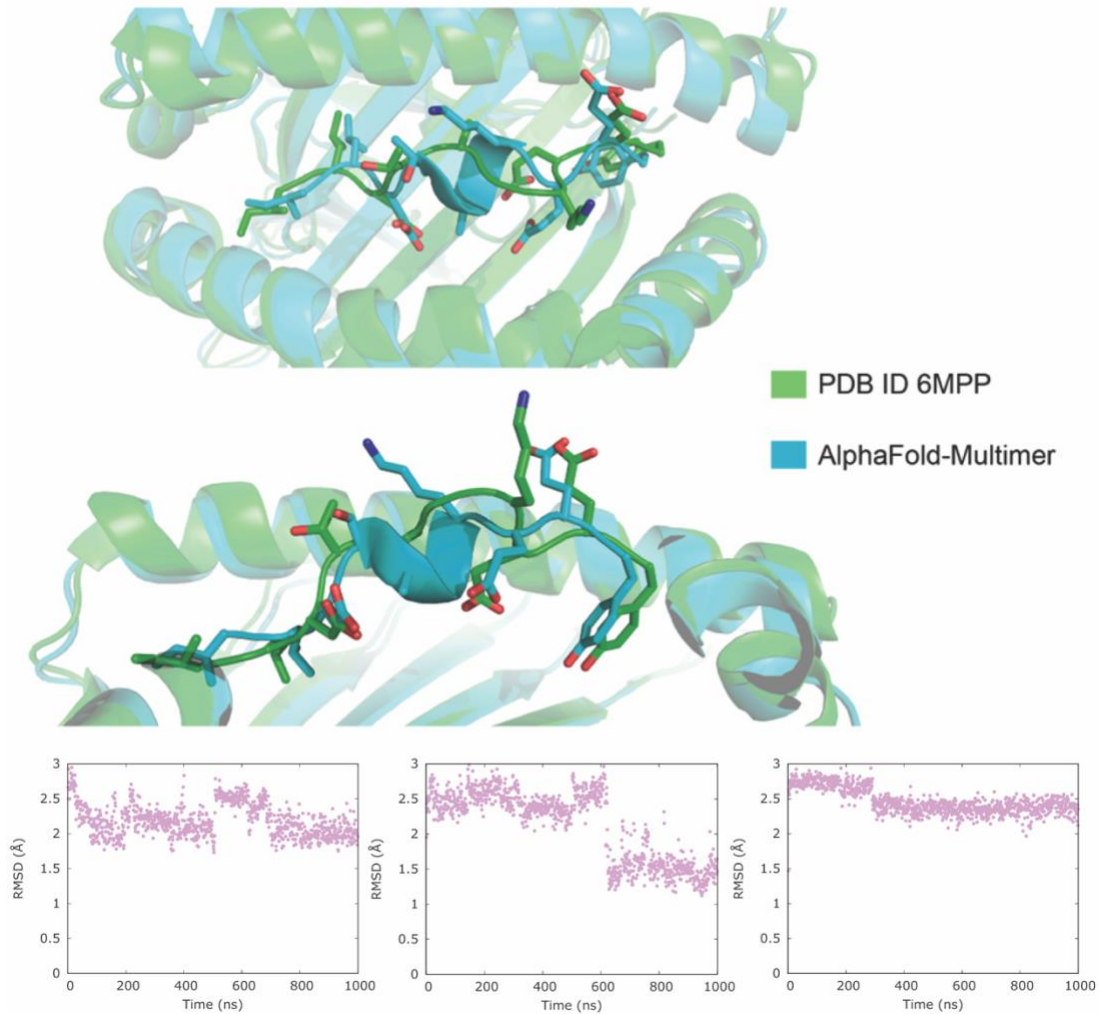

214  
215  
216  
217  
218  
219

**Supplementary Figure 17. AlphaFold-Multimer Prediction of the NRAS<sup>Q61K</sup>/HLA-A\*01:01 structure and comparison with MD simulation.** Comparison of the NMR structure of NRAS<sup>Q61K</sup>/HLA-A\*01:01 (PDB ID 6MPP- green) with the AlphaFold-Multimer model (blue – generated using the DeepMind AlphaFold Colab notebook). Backbone RMSD plots of the MD trajectories for NRAS<sup>Q61K</sup>/HLA-A\*01:01 against the AlphaFold-Multimer model.

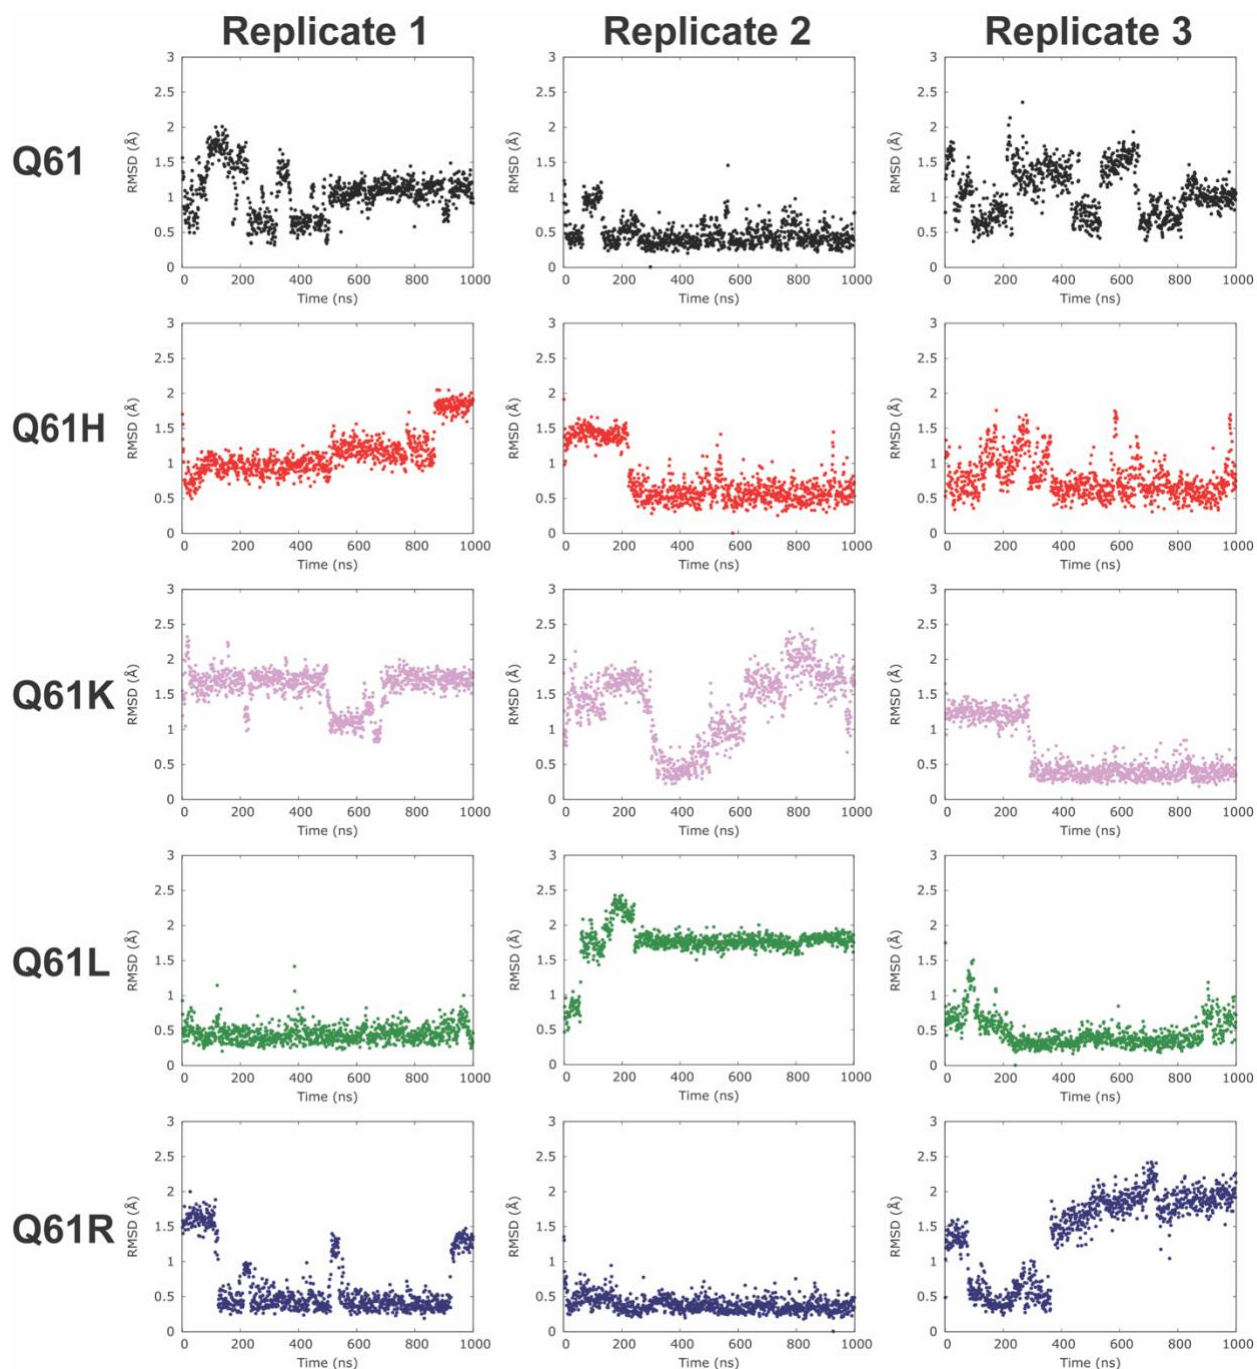

220  
 221 **Supplementary Figure 18. MD-simulation derived plots of RMSD vs. time for each mutant.**  
 222 RMSD was computed by comparison with the centroid of the major conformational cluster  
 223 observed for each mutant.  
 224
