# Supplementary material for: Conformational plasticity of RAS Q61 family of neoepitopes results in distinct features for targeted recognition
Source: PubMed Central journal article supplement (PMC10713829; doi:10.1038/s41467-023-43654-9), 2023-12-11
Supplement: 41467_2023_43654_MOESM3_ESM.pdf [file 41467_2023_43654_MOESM3_ESM.pdf]

## Description of Additional Supplementary Files

### **Supplementary data 1**

**Description:** Supplementary HDX Table 6.xlsx Supplementary HDX Table 6. HDX data output of kinetics plots for peptide-free, NRASQ61K, NRASQ61, NRASQ61H, NRASQ61L, and NRASQ61R peptide-loaded HLA-A\*01:01/h $\beta$ 2m complexes.

### **Supplementary data 2**

**Description:** Supplementary HDX Table 7.xlsx HDX data summary for peptide-free, NRASQ61K, NRASQ61, NRASQ61H, NRASQ61L, and NRASQ61R peptide-loaded HLA-A\*01:01/h $\beta$ 2m complexes.

### **Supplementary data 3**

**Description:** Supplementary HDX Table 8.xlsx HDX data summary for changes in deuterium uptake between peptide-free and NRASQ61K peptide-loaded HLA-A\*01:01 for each peptide fragment.
